# Supplementary material for: Prenatal 1‐Nitropyrene Exposure Causes Autism‐Like Behavior Partially by Altering DNA Hydroxymethylation in Developing Brain
Source: PubMed Central journal article supplement (PMC11267330; doi:10.1002/advs.202306294), 2024-05-16
Supplement: ADVS-11-2306294-s002.pdf [file ADVS-11-2306294-s002.pdf]

## Supporting Information

for *Adv. Sci.*, DOI 10.1002/adv.202306294

Prenatal 1-Nitropyrene Exposure Causes Autism-Like Behavior Partially by Altering DNA Hydroxymethylation in Developing Brain

*Ting Zhao, Cheng-Qing Huang, Yi-Hao Zhang, Yan-Yan Zhu, Xiao-Xi Chen, Tao Wang, Jing Shao, Xiu-Hong Meng, Yichao Huang, Hua Wang, Hui-Li Wang, Bo Wang\* and De-Xiang Xu\**

## Supplementary data

### Method

#### *Measurement of 5hmC*

APOBEC-coupled epigenetic sequencing (ACE-Seq) was used to detect 5hmC content in specific genes. Multiplex PCR of *Nrg1*, *ErbB4* and *Sema3F* genes was performed. The primers were listed in supplemental Table S1. PCR products were then performed with T4 Phage  $\beta$ -glucosyltransferase and APOBEC3A (A3A). Following deamination, the products were sequenced using the Accel Methyl-NGS kit (Swift Biosciences, Inc). Bismark (v0.14.3) was used to map the trimmed reads to the reference genomes. For each cytosine within CG dinucleotides, “C” bases from ACE-Seq were considered to be 5hmC. By contrast, “T” bases were considered to be methylated or unmodified cytosines.

### Figures

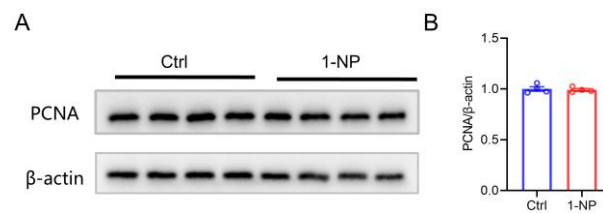

**Fig.S1. Influence of gestational 1-NP exposure on PCNA protein in fetal forebrain.** PCNA, a maker for cell proliferation, was determined by Western blotting. N=4.  $t=0.317$ ,  $df=6$ ,  $P=0.762$ .

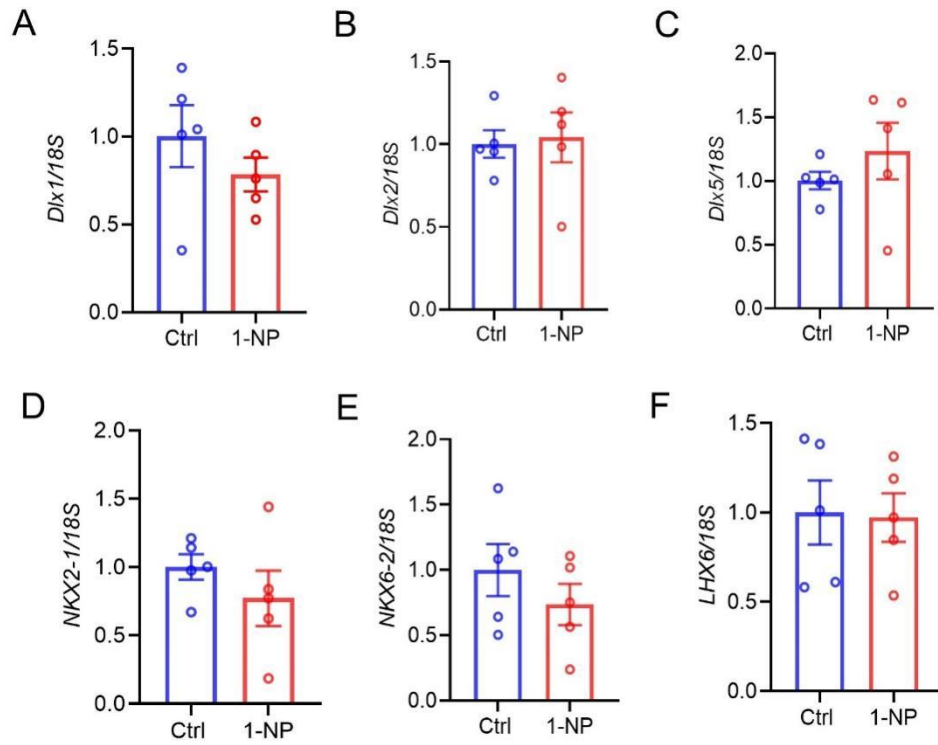

**Fig.S2. Influence of gestational 1-NP exposure on the expression of differentiation related genes in forebrain interneuron.** Differentiation-related genes in forebrain interneuron were detected in RT-PCR on GD14. N=5. (A) Dlx1.  $t=1.087$ ,  $df=8$ ,  $P=0.308$ . (B) Dlx2.  $t=0.232$ ,  $df=8$ ,  $P=0.822$ . (C) Dlx5.  $t=0.999$ ,  $df=8$ ,  $P=0.347$ . (D) NKX2-1.  $t=1.027$ ,  $df=8$ ,  $P=0.334$ . (E) NKX6-2.  $t=1.037$ ,  $df=8$ ,  $P=0.330$ . (F) LHX6.  $t=0.126$ ,  $df=8$ ,  $P=0.903$ .

### Statistical analysis in the figure legends

**Fig. 2. Influence of maternal 1-NP exposure on autism-like behavior in offspring.**

|                  | Groups           |          | <i>t</i> value | df     | <i>P</i> value |
|------------------|------------------|----------|----------------|--------|----------------|
| <b>Figure 2B</b> | 1-NP (0 µg/kg)   | S1 vs E  | 2.135          | 16     | 0.049          |
|                  | 1-NP (10 µg/kg)  | S1 vs E  | 0.286          | 20     | 0.778          |
|                  | 1-NP (100 µg/kg) | S1 vs E  | 2.790          | 8.947  | 0.021          |
| <b>Figure 2C</b> | 1-NP (0 µg/kg)   | S1 vs E  | 4.591          | 16     | <0.01          |
|                  | 1-NP (10 µg/kg)  | S1 vs E  | 2.395          | 13.52  | 0.032          |
|                  | 1-NP (100 µg/kg) | S1 vs E  | 0.416          | 20     | 0.682          |
| <b>Figure 2E</b> | 1-NP (0 µg/kg)   | S1 vs S2 | -2.296         | 16     | 0.036          |
|                  | 1-NP (10 µg/kg)  | S1 vs S2 | -2.017         | 15.057 | 0.052          |
|                  | 1-NP (100 µg/kg) | S1 vs S2 | 0.100          | 16     | 0.921          |
| <b>Figure 2F</b> | 1-NP (0 µg/kg)   | S1 vs S2 | -4.173         | 20     | <0.01          |
|                  | 1-NP (10 µg/kg)  | S1 vs S2 | 2.395          | 13.52  | 0.032          |
|                  | 1-NP (100 µg/kg) | S1 vs S2 | -0.877         | 20     | 0.391          |
| <b>Figure 2H</b> | 1-NP (0 µg/kg)   | S1 vs E  | 1.979          | 16     | 0.065          |
|                  | 1-NP (10 µg/kg)  | S1 vs E  | -0.045         | 20     | 0.965          |
|                  | 1-NP (100 µg/kg) | S1 vs E  | -1.569         | 20     | 0.132          |
| <b>Figure 2I</b> | 1-NP (0 µg/kg)   | S1 vs E  | 2.481          | 16     | 0.025          |
|                  | 1-NP (10 µg/kg)  | S1 vs E  | 0.921          | 18     | 0.369          |
|                  | 1-NP (100 µg/kg) | S1 vs E  | 3.872          | 20     | <0.01          |
| <b>Figure 2K</b> | 1-NP (0 µg/kg)   | S1 vs S2 | -2.275         | 16     | 0.037          |
|                  | 1-NP (10 µg/kg)  | S1 vs S2 | -0.676         | 20     | 0.507          |
|                  | 1-NP (100 µg/kg) | S1 vs S2 | -0.358         | 20     | 0.724          |
| <b>Figure 2L</b> | 1-NP (0 µg/kg)   | S1 vs S2 | -4.221         | 16     | <0.01          |
|                  | 1-NP (10 µg/kg)  | S1 vs S2 | -3.280         | 18     | <0.01          |
|                  | 1-NP (100 µg/kg) | S1 vs S2 | 0.003          | 20     | 0.998          |

**Fig. 3. Influence of maternal 1-NP exposure on mIPSC in offspring.**

|                  | Groups                             | <i>t</i> value | df | <i>P</i> value |
|------------------|------------------------------------|----------------|----|----------------|
| <b>Figure 3B</b> | 1-NP (0 µg/kg) vs 1-NP (100 µg/kg) | 4.181          | 22 | <0.01          |
| <b>Figure 3C</b> | 1-NP (0 µg/kg) vs 1-NP (100 µg/kg) | 1.069          | 22 | 0.297          |
| <b>Figure 3E</b> | 1-NP (0 µg/kg) vs 1-NP (100 µg/kg) | 0.145          | 22 | 0.887          |
| <b>Figure 3F</b> | 1-NP (0 µg/kg) vs 1-NP (100 µg/kg) | 2.481          | 22 | 0.0212         |
| <b>Figure 3H</b> | 1-NP (0 µg/kg) vs 1-NP (100 µg/kg) | 8.575          | 22 | <0.01          |
| <b>Figure 3I</b> | 1-NP (0 µg/kg) vs 1-NP (100 µg/kg) | 2.514          | 22 | 0.02           |
| <b>Figure 3K</b> | 1-NP (0 µg/kg) vs 1-NP (100 µg/kg) | 0.815          | 22 | 0.424          |
| <b>Figure 3L</b> | 1-NP (0 µg/kg) vs 1-NP (100 µg/kg) | 4.118          | 22 | <0.01          |

**Fig. 4. Influence of maternal 1-NP exposure on GAD67+ interneurons in weaning offspring.**

|                  | Groups                             | <i>t</i> value | df | <i>P</i> value |
|------------------|------------------------------------|----------------|----|----------------|
| <b>Figure 4B</b> | 1-NP (0 µg/kg) vs 1-NP (100 µg/kg) | 2.558          | 6  | 0.043          |

|                  |                                    |                                       |        |       |       |
|------------------|------------------------------------|---------------------------------------|--------|-------|-------|
| <b>Figure 4D</b> | 1-NP (0 µg/kg) vs 1-NP (100 µg/kg) |                                       | 0.075  | 6     | 0.943 |
|                  | Cg1                                | 1-NP (0 µg/kg) vs<br>1-NP (100 µg/kg) | 6.985  | 4.517 | <0.01 |
| <b>Figure 4F</b> | PrL                                | 1-NP (0 µg/kg) vs<br>1-NP (100 µg/kg) | 4.796  | 6     | <0.01 |
|                  | IL                                 | 1-NP (0 µg/kg) vs<br>1-NP (100 µg/kg) | 6.245  | 3.576 | <0.01 |
|                  | Cg1                                | 1-NP (0 µg/kg) vs<br>1-NP (100 µg/kg) | -0.872 | 6     | 0.417 |
| <b>Figure 4G</b> | PrL                                | 1-NP (0 µg/kg) vs<br>1-NP (100 µg/kg) | -0.264 | 6     | 0.8   |
|                  | IL                                 | 1-NP (0 µg/kg) vs<br>1-NP (100 µg/kg) | 0.115  | 6     | 0.912 |
| <b>Figure 4I</b> | 1-NP (0 µg/kg) vs 1-NP (100 µg/kg) |                                       | 2.558  | 6     | 0.043 |
| <b>Figure 4K</b> | 1-NP (0 µg/kg) vs 1-NP (100 µg/kg) |                                       | 0.075  | 6     | 0.943 |
|                  | Cg1                                | 1-NP (0 µg/kg) vs<br>1-NP (100 µg/kg) | 6.735  | 3.859 | <0.01 |
| <b>Figure 4M</b> | PrL                                | 1-NP (0 µg/kg) vs<br>1-NP (100 µg/kg) | 3.202  | 3.685 | 0.037 |
|                  | IL                                 | 1-NP (0 µg/kg) vs<br>1-NP (100 µg/kg) | 2.728  | 4     | 0.052 |
|                  | Cg1                                | 1-NP (0 µg/kg) vs<br>1-NP (100 µg/kg) | -1.500 | 6     | 0.184 |
| <b>Figure 4N</b> | PrL                                | 1-NP (0 µg/kg) vs<br>1-NP (100 µg/kg) | -2.477 | 6     | 0.048 |
|                  | IL                                 | 1-NP (0 µg/kg) vs<br>1-NP (100 µg/kg) | -0.647 | 6     | 0.541 |

**Fig. 5. Influence of gestational 1-NP exposure on migration of interneurons in fetal brain.**

|                  | Groups                             |                                       | <i>t</i> value | df | <i>P</i> value |
|------------------|------------------------------------|---------------------------------------|----------------|----|----------------|
| <b>Figure 5B</b> | 1-NP (0 µg/kg) vs 1-NP (100 µg/kg) |                                       | 3.421          | 4  | 0.027          |
|                  | SVZ/VZ                             | 1-NP (0 µg/kg) vs<br>1-NP (100 µg/kg) | -3.426         | 6  | 0.014          |
| <b>Figure 5D</b> | IZ                                 | 1-NP (0 µg/kg) vs<br>1-NP (100 µg/kg) | 0.110          | 6  | 0.916          |
|                  | CP                                 | 1-NP (0 µg/kg) vs<br>1-NP (100 µg/kg) | 3.279          | 6  | 0.017          |
|                  | MZ                                 | 1-NP (0 µg/kg) vs<br>1-NP (100 µg/kg) | 3.110          | 6  | 0.021          |
| <b>Figure 5F</b> | 1-NP (0 µg/kg) vs 1-NP (100 µg/kg) |                                       | 2.820          | 4  | 0.048          |
|                  | SVZ/VZ                             | 1-NP (0 µg/kg) vs<br>1-NP (100 µg/kg) | -2.318         | 6  | 0.06           |
| <b>Figure 5H</b> | IZ                                 | 1-NP (0 µg/kg) vs<br>1-NP (100 µg/kg) | 0.460          | 6  | 0.662          |

|                  |                                    |                                       |        |   |        |
|------------------|------------------------------------|---------------------------------------|--------|---|--------|
|                  | CP                                 | 1-NP (0 µg/kg) vs<br>1-NP (100 µg/kg) | 6.401  | 6 | <0.01  |
|                  | MZ                                 | 1-NP (0 µg/kg) vs<br>1-NP (100 µg/kg) | 4.267  | 6 | <0.01  |
| <b>Figure 5J</b> | 1-NP (0 µg/kg) vs 1-NP (100 µg/kg) |                                       | 0.287  | 6 | 0.784  |
|                  | Bin 1                              | 1-NP (0 µg/kg) vs<br>1-NP (100 µg/kg) | 1.082  | 6 | 0.321  |
| <b>Figure 5L</b> | Bin 2                              | 1-NP (0 µg/kg) vs<br>1-NP (100 µg/kg) | 2.392  | 6 | 0.054  |
|                  | Bin 3                              | 1-NP (0 µg/kg) vs<br>1-NP (100 µg/kg) | 2.591  | 6 | 0.041  |
| <b>Figure 5M</b> | Cxcl12                             | Ctrl vs 1-NP                          | 0.456  | 8 | 0.660  |
| <b>Figure 5N</b> | Cxcr4                              | Ctrl vs 1-NP                          | 0.194  | 8 | 0.851  |
| <b>Figure 5O</b> | Cxcr7                              | Ctrl vs 1-NP                          | 2.090  | 8 | 0.07   |
| <b>Figure 5P</b> | Slit1                              | Ctrl vs 1-NP                          | 0.6086 | 8 | 0.547  |
| <b>Figure 5Q</b> | Efna5                              | Ctrl vs 1-NP                          | 0.036  | 8 | .9718  |
| <b>Figure 5R</b> | Arx                                | Ctrl vs 1-NP                          | 0.507  | 8 | 0.625  |
| <b>Figure 5S</b> | Nrp1                               | Ctrl vs 1-NP                          | 1.279  | 8 | 0.237  |
| <b>Figure 5T</b> | Nrp2                               | Ctrl vs 1-NP                          | 0.291  | 8 | 0.778  |
| <b>Figure 5U</b> | Sema3A                             | Ctrl vs 1-NP                          | 0.765  | 8 | 0.466  |
| <b>Figure 5V</b> | Nrg1                               | Ctrl vs 1-NP                          | 2.477  | 8 | 0.038  |
| <b>Figure 5W</b> | ErbB4                              | Ctrl vs 1-NP                          | 3.353  | 8 | 0.01   |
| <b>Figure 5X</b> | Sema3F                             | Ctrl vs 1-NP                          | 2.494  | 8 | 0.0373 |

**Fig. 6. Influence of gestational 1-NP exposure on hydroxymethylation of interneuron migration-related genes in fetal forebrain.**

|                  | Groups             | <i>t</i> value                        | df     | <i>P</i> value |       |
|------------------|--------------------|---------------------------------------|--------|----------------|-------|
|                  | Nrg1_1             | 1-NP (0 µg/kg) vs<br>1-NP (100 µg/kg) | -0.268 | 8              | 0.795 |
|                  | Nrg1_2             | 1-NP (0 µg/kg) vs<br>1-NP (100 µg/kg) | -0.679 | 8              | 0.516 |
| <b>Figure 6B</b> | ErbB4              | 1-NP (0 µg/kg) vs<br>1-NP (100 µg/kg) | -0.358 | 8              | 0.73  |
|                  | Sema3F_1           | 1-NP (0 µg/kg) vs<br>1-NP (100 µg/kg) | 3.264  | 8              | 0.011 |
|                  | Sema3F_2           | 1-NP (0 µg/kg) vs<br>1-NP (100 µg/kg) | -0.841 | 8              | 0.425 |
|                  | Nrg1_2 (9246 site) | 1-NP (0 µg/kg) vs<br>1-NP (100 µg/kg) | 2.766  | 8              | 0.024 |
| <b>Figure 6C</b> | ErbB4 (7743 site)  | 1-NP (0 µg/kg) vs<br>1-NP (100 µg/kg) | 2.177  | 8              | 0.061 |
|                  | ErbB4 (7866 site)  | 1-NP (0 µg/kg) vs<br>1-NP (100 µg/kg) | 2.363  | 8              | 0.046 |

|                  |                                    |                                       |        |       |        |
|------------------|------------------------------------|---------------------------------------|--------|-------|--------|
|                  | Sema3F_1<br>(9269 site)            | 1-NP (0 µg/kg) vs<br>1-NP (100 µg/kg) | 2.567  | 8     | 0.033  |
|                  | Sema3F_1<br>(9348 site)            | 1-NP (0 µg/kg) vs<br>1-NP (100 µg/kg) | 4.555  | 8     | <0.01  |
|                  | Sema3F_2<br>(0238 site)            | 1-NP (0 µg/kg) vs<br>1-NP (100 µg/kg) | 2.577  | 8     | 0.033  |
| <b>Figure 6D</b> | Tet1                               | 1-NP (0 µg/kg) vs<br>1-NP (100 µg/kg) | -2.634 | 4.330 | 0.053  |
|                  | Tet2                               | 1-NP (0 µg/kg) vs<br>1-NP (100 µg/kg) | 0.86   | 8     | 0.415  |
|                  | Tet3                               | 1-NP (0 µg/kg) vs<br>1-NP (100 µg/kg) | -2.250 | 8     | 0.055  |
| <b>Figure 6F</b> | Tet1                               | 1-NP (0 µg/kg) vs<br>1-NP (100 µg/kg) | 1.448  | 6     | 0.1978 |
|                  | Tet2                               | 1-NP (0 µg/kg) vs<br>1-NP (100 µg/kg) | 0.791  | 6     | 0.459  |
|                  | Tet3                               | 1-NP (0 µg/kg) vs<br>1-NP (100 µg/kg) | 0.245  | 6     | 0.814  |
| <b>Figure 6G</b> | 1-NP (0 µg/kg) vs 1-NP (100 µg/kg) |                                       | 3.400  | 8     | <0.01  |

**Fig. 7. Influence of gestational 1-NP exposure on mitochondrial function in fetal forebrain.**

|                  | Groups       | <i>t</i> value | df | <i>P</i> value |
|------------------|--------------|----------------|----|----------------|
| <b>Figure 7H</b> | Ctrl vs 1-NP | 0.263          | 6  | 0.802          |
| <b>Figure 7I</b> | Ctrl vs 1-NP | 2.890          | 6  | 0.027          |
| <b>Figure 7K</b> | Ctrl vs 1-NP | 4.133          | 6  | <0.01          |
| <b>Figure 7L</b> | Ctrl vs 1-NP | 2.733          | 6  | 0.034          |
| <b>Figure 7N</b> | Ctrl vs 1-NP | 4.175          | 6  | <0.01          |
| <b>Figure 7O</b> | Ctrl vs 1-NP | 2.791          | 6  | 0.024          |

**Fig. 8. Effects of supplementation with  $\alpha$ -KG on 1-NP-evoked hypohydroxymethylation of interneuron migration-related genes and interneuron migration inhibition in fetal forebrain.**

|                               | Groups                        | <b>F</b> value           | df    | <i>P</i> value |
|-------------------------------|-------------------------------|--------------------------|-------|----------------|
| <b>Figure 8A</b>              | $\alpha$ -KG main effect      | 0.587                    | 1     | 0.455          |
|                               | 1-NP main effect              | 20.039                   | 1     | <0.01          |
|                               | $\alpha$ -KG*1-NP interaction | 4.355                    | 1     | 0.053          |
|                               | Ctrl vs 1-NP                  | -                        | -     | <0.01          |
|                               | 1-NP vs 1-NP+ $\alpha$ -kG    | -                        | -     | 0.061          |
|                               | <b>Figure 8B</b>              | $\alpha$ -KG main effect | 0.075 | 1              |
| 1-NP main effect              |                               | 1.671                    | 1     | 0.214          |
| $\alpha$ -KG*1-NP interaction |                               | 1.759                    | 1     | 0.203          |
| Ctrl vs 1-NP                  |                               | -                        | -     | 0.083          |
| 1-NP vs 1-NP+ $\alpha$ -kG    |                               | -                        | -     | 0.274          |

|                  |                               |                               |        |       |       |
|------------------|-------------------------------|-------------------------------|--------|-------|-------|
| <b>Figure 8C</b> |                               | $\alpha$ -KG main effect      | 0.063  | 1     | 0.804 |
|                  |                               | 1-NP main effect              | 12.403 | 1     | <0.01 |
|                  |                               | $\alpha$ -KG*1-NP interaction | 1.593  | 1     | 0.225 |
|                  |                               | Ctrl vs 1-NP                  | -      | -     | <0.01 |
|                  |                               | 1-NP vs 1-NP+ $\alpha$ -kG    | -      | -     | 0.300 |
| <b>Figure 8D</b> |                               | $\alpha$ -KG main effect      | 0.588  | 1     | 0.454 |
|                  |                               | 1-NP main effect              | 5.353  | 1     | 0.034 |
|                  |                               | $\alpha$ -KG*1-NP interaction | 9.544  | 1     | <0.01 |
|                  |                               | Ctrl vs 1-NP                  | -      | -     | <0.01 |
|                  |                               | 1-NP vs 1-NP+ $\alpha$ -kG    | -      | -     | 0.120 |
| <b>Figure 8E</b> |                               | $\alpha$ -KG main effect      | 0.014  | 1     | 0.909 |
|                  |                               | 1-NP main effect              | 1.785  | 1     | 0.200 |
|                  |                               | $\alpha$ -KG*1-NP interaction | 1.512  | 1     | 0.237 |
|                  |                               | Ctrl vs 1-NP                  | -      | -     | 0.088 |
|                  |                               | 1-NP vs 1-NP+ $\alpha$ -kG    | -      | -     | 0.443 |
| <b>Figure 8F</b> |                               | $\alpha$ -KG main effect      | 5.145  | 1     | 0.038 |
|                  |                               | 1-NP main effect              | 3.712  | 1     | 0.072 |
|                  |                               | $\alpha$ -KG*1-NP interaction | 10.504 | 1     | <0.01 |
|                  |                               | Ctrl vs 1-NP                  | -      | -     | <0.01 |
|                  |                               | 1-NP vs 1-NP+ $\alpha$ -kG    | -      | -     | <0.01 |
| <b>Figure 8G</b> |                               | $\alpha$ -KG main effect      | 0.199  | 1     | 0.662 |
|                  |                               | 1-NP main effect              | 3.036  | 1     | 0.101 |
|                  |                               | $\alpha$ -KG*1-NP interaction | 6.155  | 1     | 0.025 |
|                  |                               | Ctrl vs 1-NP                  | -      | -     | <0.01 |
|                  |                               | 1-NP vs 1-NP+ $\alpha$ -kG    | -      | -     | <0.01 |
| <b>Figure 8H</b> |                               | $\alpha$ -KG main effect      | 0.040  | 1     | 0.843 |
|                  |                               | 1-NP main effect              | 14.699 | 1     | <0.01 |
|                  |                               | $\alpha$ -KG*1-NP interaction | 5.187  | 1     | 0.037 |
|                  |                               | Ctrl vs 1-NP                  | -      | -     | <0.01 |
|                  |                               | 1-NP vs 1-NP+ $\alpha$ -kG    | -      | -     | 0.090 |
| <b>Figure 8I</b> |                               | $\alpha$ -KG main effect      | 0.634  | 1     | 0.438 |
|                  |                               | 1-NP main effect              | 7.255  | 1     | 0.016 |
|                  |                               | $\alpha$ -KG*1-NP interaction | 1.981  | 1     | 0.178 |
|                  |                               | Ctrl vs 1-NP                  | -      | -     | 0.010 |
|                  |                               | 1-NP vs 1-NP+ $\alpha$ -kG    | -      | -     | 0.069 |
| <b>Figure 8K</b> | Bin 1                         | $\alpha$ -KG main effect      | 1.473  | 1     | 0.248 |
|                  |                               | 1-NP main effect              | 0.829  | 1     | 0.381 |
|                  |                               | $\alpha$ -KG*1-NP interaction | 0.655  | 1     | 0.434 |
|                  |                               | Ctrl vs 1-NP                  | -      | -     | 0.247 |
|                  |                               | 1-NP vs 1-NP+ $\alpha$ -kG    | -      | -     | 0.178 |
|                  | Bin 2                         | $\alpha$ -KG main effect      | 13.963 | 1     | <0.01 |
|                  |                               | 1-NP main effect              | 2.509  | 1     | 0.139 |
|                  | $\alpha$ -KG*1-NP interaction | 2.258                         | 1      | 0.159 |       |



|       |                               |        |   |       |
|-------|-------------------------------|--------|---|-------|
|       | Ctrl vs 1-NP                  | -      | - | 0.050 |
|       | 1-NP vs 1-NP+ $\alpha$ -kG    | -      | - | <0.01 |
|       | $\alpha$ -KG main effect      | 25.004 | 1 | <0.01 |
|       | 1-NP main effect              | 25.814 | 1 | <0.01 |
| Bin 3 | $\alpha$ -KG*1-NP interaction | 2.033  | 1 | 0.179 |
|       | Ctrl vs 1-NP                  | -      | - | <0.01 |
|       | 1-NP vs 1-NP+ $\alpha$ -kG    | -      | - | <0.01 |

**Fig. 9. Effects of gestational  $\alpha$ -KG supplementation on interneurons in weaning offspring.**

|                  | Groups                        | F value | df | P value |
|------------------|-------------------------------|---------|----|---------|
| <b>Figure 9B</b> | $\alpha$ -KG main effect      | 3.062   | 1  | 0.118   |
|                  | 1-NP main effect              | 15.657  | 1  | <0.01   |
|                  | $\alpha$ -KG*1-NP interaction | 5.158   | 1  | 0.052   |
|                  | Ctrl vs 1-NP                  | -       | -  | <0.01   |
|                  | 1-NP vs 1-NP+ $\alpha$ -kG    | -       | -  | 0.022   |
| Cg1              | $\alpha$ -KG main effect      | 13.905  | 1  | <0.01   |
|                  | 1-NP main effect              | 20.137  | 1  | <0.01   |
|                  | $\alpha$ -KG*1-NP interaction | 12.084  | 1  | <0.01   |
|                  | Ctrl vs 1-NP                  | -       | -  | <0.01   |
|                  | 1-NP vs 1-NP+ $\alpha$ -kG    | -       | -  | <0.01   |
| <b>Figure 9D</b> | $\alpha$ -KG main effect      | 4.842   | 1  | 0.048   |
|                  | 1-NP main effect              | 16.70   | 1  | <0.01   |
|                  | $\alpha$ -KG*1-NP interaction | 3.798   | 1  | 0.075   |
|                  | Ctrl vs 1-NP                  | -       | -  | <0.01   |
|                  | 1-NP vs 1-NP+ $\alpha$ -kG    | -       | -  | 0.013   |
| IL               | $\alpha$ -KG main effect      | 2.803   | 1  | 0.120   |
|                  | 1-NP main effect              | 11.212  | 1  | <0.01   |
|                  | $\alpha$ -KG*1-NP interaction | 2.803   | 1  | 0.120   |
|                  | Ctrl vs 1-NP                  | -       | -  | <0.01   |
|                  | 1-NP vs 1-NP+ $\alpha$ -kG    | -       | -  | 0.036   |
| <b>Figure 9E</b> | $\alpha$ -KG main effect      | 0.004   | 1  | 0.953   |
|                  | 1-NP main effect              | 0.613   | 1  | 0.449   |
|                  | $\alpha$ -KG*1-NP interaction | 0.033   | 1  | 0.860   |
|                  | Ctrl vs 1-NP                  | -       | -  | 0.509   |
|                  | 1-NP vs 1-NP+ $\alpha$ -kG    | -       | -  | 0.934   |
| PrL              | $\alpha$ -KG main effect      | 1.738   | 1  | 0.212   |
|                  | 1-NP main effect              | 0.679   | 1  | 0.426   |
|                  | $\alpha$ -KG*1-NP interaction | 0.033   | 1  | 0.860   |
|                  | Ctrl vs 1-NP                  | -       | -  | 0.431   |
|                  | 1-NP vs 1-NP+ $\alpha$ -kG    | -       | -  | 0.498   |

|                  |    |                               |        |   |       |
|------------------|----|-------------------------------|--------|---|-------|
|                  |    | $\alpha$ -KG main effect      | 0.123  | 1 | 0.732 |
|                  |    | 1-NP main effect              | 0.123  | 1 | 0.732 |
|                  | IL | $\alpha$ -KG*1-NP interaction | 0.204  | 1 | 0.660 |
|                  |    | Ctrl vs 1-NP                  | -      | - | 0.945 |
|                  |    | 1-NP vs 1-NP+ $\alpha$ -kG    | -      | - | 0.581 |
| <b>Figure 9G</b> |    | $\alpha$ -KG main effect      | 1.171  | 1 | 0.311 |
|                  |    | 1-NP main effect              | 6.809  | 1 | 0.031 |
|                  |    | $\alpha$ -KG*1-NP interaction | 3.973  | 1 | 0.081 |
|                  |    | Ctrl vs 1-NP                  | -      | - | 0.012 |
|                  |    | 1-NP vs 1-NP+ $\alpha$ -kG    | -      | - | 0.061 |
|                  |    | $\alpha$ -KG main effect      | 4.757  | 1 | 0.050 |
|                  |    | 1-NP main effect              | 42.971 | 1 | <0.01 |
|                  |    | $\alpha$ -KG*1-NP interaction | 1.255  | 1 | 0.285 |
|                  |    | Ctrl vs 1-NP                  | -      | - | <0.01 |
|                  |    | 1-NP vs 1-NP+ $\alpha$ -kG    | -      | - | 0.038 |
| <b>Figure 9I</b> |    | $\alpha$ -KG main effect      | 0.062  | 1 | 0.807 |
|                  |    | 1-NP main effect              | 17.266 | 1 | <0.01 |
|                  |    | $\alpha$ -KG*1-NP interaction | 1.813  | 1 | 0.203 |
|                  |    | Ctrl vs 1-NP                  | -      | - | <0.01 |
|                  |    | 1-NP vs 1-NP+ $\alpha$ -kG    | -      | - | 0.281 |
|                  |    | $\alpha$ -KG main effect      | 3.286  | 1 | 0.095 |
|                  |    | 1-NP main effect              | 17.217 | 1 | <0.01 |
|                  |    | $\alpha$ -KG*1-NP interaction | 2.199  | 1 | 0.164 |
|                  |    | Ctrl vs 1-NP                  | -      | - | <0.01 |
|                  |    | 1-NP vs 1-NP+ $\alpha$ -kG    | -      | - | 0.038 |
|                  |    | $\alpha$ -KG main effect      | 0.778  | 1 | 0.395 |
|                  |    | 1-NP main effect              | 1.130  | 1 | 0.309 |
|                  |    | $\alpha$ -KG*1-NP interaction | 0.001  | 1 | 0.982 |
|                  |    | Ctrl vs 1-NP                  | -      | - | 0.476 |
|                  |    | 1-NP vs 1-NP+ $\alpha$ -kG    | -      | - | 0.534 |
| <b>Figure 9J</b> |    | $\alpha$ -KG main effect      | 0.046  | 1 | 0.834 |
|                  |    | 1-NP main effect              | 7.292  | 1 | 0.019 |
|                  |    | $\alpha$ -KG*1-NP interaction | 1.546  | 1 | 0.237 |
|                  |    | Ctrl vs 1-NP                  | -      | - | 0.481 |
|                  |    | 1-NP vs 1-NP+ $\alpha$ -kG    | -      | - | 0.323 |
|                  |    | $\alpha$ -KG main effect      | 0.601  | 1 | 0.453 |
|                  |    | 1-NP main effect              | 0.082  | 1 | 0.779 |
|                  |    | $\alpha$ -KG*1-NP interaction | 0.082  | 1 | 0.779 |
|                  |    | Ctrl vs 1-NP                  | -      | - | 0.692 |
|                  |    | 1-NP vs 1-NP+ $\alpha$ -kG    | -      | - | 0.467 |

**Fig. 10. Effects of gestational  $\alpha$ -KG supplementation on 1-NP-induced mIPSC transmission disorder and autism-like behaviors.**

|                   | <b>Groups</b>                 |          | <b>F value</b> | <b>df</b> | <b>P value</b> |
|-------------------|-------------------------------|----------|----------------|-----------|----------------|
| <b>Figure 10B</b> | $\alpha$ -KG main effect      |          | 5.135          | 1         | 0.028          |
|                   | 1-NP main effect              |          | 35.559         | 1         | <0.01          |
|                   | $\alpha$ -KG*1-NP interaction |          | 3.084          | 1         | 0.085          |
|                   | Ctrl vs 1-NP                  |          | -              | -         | <0.01          |
|                   | 1-NP vs 1-NP+ $\alpha$ -kG    |          | -              | -         | <0.01          |
| <b>Figure 10C</b> | $\alpha$ -KG main effect      |          | 1.611          | 1         | 0.210          |
|                   | 1-NP main effect              |          | 8.726          | 1         | <0.01          |
|                   | $\alpha$ -KG*1-NP interaction |          | 0.012          | 1         | 0.913          |
|                   | Ctrl vs 1-NP                  |          | -              | -         | 0.050          |
|                   | 1-NP vs 1-NP+ $\alpha$ -kG    |          | -              | -         | 0.335          |
| <b>Figure 10E</b> | $\alpha$ -KG main effect      |          | 0.140          | 1         | 0.710          |
|                   | 1-NP main effect              |          | 0.002          | 1         | 0.968          |
|                   | $\alpha$ -KG*1-NP interaction |          | 0.002          | 1         | 0.962          |
|                   | Ctrl vs 1-NP                  |          | -              | -         | 0.951          |
|                   | 1-NP vs 1-NP+ $\alpha$ -kG    |          | -              | -         | 0.767          |
| <b>Figure 10F</b> | $\alpha$ -KG main effect      |          | 0.033          | 1         | 0.858          |
|                   | 1-NP main effect              |          | 9.319          | 1         | <0.01          |
|                   | $\alpha$ -KG*1-NP interaction |          | 6.794          | 1         | 0.012          |
|                   | Ctrl vs 1-NP                  |          | -              | -         | <0.01          |
|                   | 1-NP vs 1-NP+ $\alpha$ -kG    |          | -              | -         | 0.093          |
| <b>Figure 10G</b> | Ctrl                          | S1 vs E  | 2.893          | 18        | 0.01           |
|                   | $\alpha$ -kG                  | S1 vs E  | 0.147          | 20        | 0.044          |
|                   | 1-NP                          | S1 vs E  | 1.566          | 18        | 0.135          |
|                   | 1-NP+ $\alpha$ -kG            | S1 vs E  | 2.356          | 16        | 0.032          |
| <b>Figure 10H</b> | Ctrl                          | S1 vs S2 | -3.900         | 18        | <0.01          |
|                   | $\alpha$ -kG                  | S1 vs S2 | -3.787         | 20        | <0.01          |
|                   | 1-NP                          | S1 vs S2 | 0.833          | 18        | 0.416          |
|                   | 1-NP+ $\alpha$ -kG            | S1 vs S2 | -6.918         | 16        | <0.01          |
| <b>Figure 10I</b> | Ctrl                          | S1 vs E  | 3.858          | 18        | <0.01          |
|                   | $\alpha$ -kG                  | S1 vs E  | 2.371          | 18        | 0.029          |
|                   | 1-NP                          | S1 vs E  | 1.292          | 16        | 0.215          |
|                   | 1-NP+ $\alpha$ -kG            | S1 vs E  | 2.704          | 18        | 0.015          |
| <b>Figure 10J</b> | Ctrl                          | S1 vs S2 | -3.782         | 13.042    | <0.01          |
|                   | $\alpha$ -kG                  | S1 vs S2 | -2.256         | 11.934    | 0.044          |
|                   | 1-NP                          | S1 vs S2 | -1.280         | 16        | 0.219          |
|                   | 1-NP+ $\alpha$ -kG            | S1 vs S2 | -3.705         | 18        | <0.01          |

Table S1 Primers for Multiplex PCR in measurement of 5hmC

| Genes    | Sequences                             |
|----------|---------------------------------------|
| Nrg1_1   | Forward: AGATTTAGAGGATTYGGGAGGA       |
|          | Reverse: ACCCRAACCCAAATAAATACCA       |
| Nrg1_2   | Forward: GYGATAAGTTTGGTTTAAGGGTTTGTAG |
|          | Reverse: CCCRAAACACCCCCAAAC           |
| ErbB4    | Forward: GGGTTTAYGGGTTTGGAAAGT        |
|          | Reverse: ACTCCCCCAAACCCAAAA           |
| Sema3F_1 | Forward: TTGYGGGGGTGGAAAAAG           |
|          | Reverse: CCTCCCRACCCCACTAAAA          |
| Sema3F_2 | Forward: GGGTAGGGTTTAGGGTTTTTAGG      |
|          | Reverse: CCAACCCTTCTACCCAAAA          |

Table S2 Primers for real-time RT-PCR

| Genes         | Sequences                          |
|---------------|------------------------------------|
| <i>18S</i>    | Forward: GTAACCCGTTGAACCCATT       |
|               | Reverse: CCATCCAATCGGTAGTAGCG      |
| <i>Tet1</i>   | Forward: ACACAGTGGTGCTAATGCAG      |
|               | Reverse: AGCATGAACGGGAGAATCGG      |
| <i>Tet2</i>   | Forward: AGAGAAGACAATCGAGAAGTCGG   |
|               | Reverse: CCTTCCGTACTCCCAAACCTCAT   |
| <i>Tet3</i>   | Forward: GTAACCCGTTGAACCCATT       |
|               | Reverse: CCATCCAATCGGTAGTAGCG      |
| <i>ErbB4</i>  | Forward: GGAACAGCAGTACCGAGCCTTG    |
|               | Reverse: GGATAGACCGCAGGAAGGAGAGG   |
| <i>Nrg1</i>   | Forward: GCTCATCACTCCACGACTGTCAC   |
|               | Reverse: CTGCTGTGCTGCTGTTCTCTAC    |
| <i>Cxcl12</i> | Forward: ACCAGTCAGCCTGAGCTACCG     |
|               | Reverse: AAGGGCACAGTTTGGAGTGTTGAG  |
| <i>Cxcr4</i>  | Forward: GTCAACCTCTACAGCAGCGTTCTC  |
|               | Reverse: CTGACTGTTGGTGGCGTGGAC     |
| <i>Sema3A</i> | Forward: TGGGACGGGACTTCGCTATCTTC   |
|               | Reverse: GGGATGAGATGGGCACTGATGAATC |
| <i>Sema3F</i> | Forward: GACCTGCATGACATCAACCGAGAG  |
|               | Reverse: CTCCATTGCCATCCTTGCTGAC    |
| <i>Nrp1</i>   | Forward: ACAGCATCCAATCAAGCCGACAG   |
|               | Reverse: TCTTCTCATCTCCCAGGTCCACTTG |
| <i>Nrp2</i>   | Forward: ATCAGTGCCTCCTCCACCTTCTC   |
|               | Reverse: TGTCCAGCCATTGTCATCACCATG  |
| <i>Slit1</i>  | Forward: GCTACGCCTGCCTCTGTGTTG     |
|               | Reverse: GGTCTACGCAGTTGGCTCCATTC   |
| <i>Efna5</i>  | Forward: ATGAGTCAGCCGAGCCATCCC     |

*Arx* Reverse: AGCATCGCCAGGAGGAACAGTAG  
Forward: AGGGCAAGGATGGTGAGGACAG  
Reverse: GCTGGTAACTGGTGAACGTGGTG  
*Dlx1* Forward: ACCACCATGCCAGAAAGTCTCAAC  
Reverse: GCCCGCCGAGTGTAACAGTG  
*Dlx2* Forward: CAACGAGCCGGACAAGGAAGAC  
Reverse: CTGGAGTAGATGGTGCGTGGTTTC  
*Dlx5* Forward: GCGACTTCCAAGCTCCGTTCC  
Reverse: AAGCAGAGGTAGGAGAGCAGTAGC  
*NKX2-1* Forward: CTCAGCCGACGCCGAATCATG  
Reverse: GCCCTCCATGCCCACTTTCTTG  
*NKX6-2* Forward: AAGTGAAGGTGTGGTTCCAGAATCG  
Reverse: CCGGTTGTATTCGTCATCGTCCTC  
*LHX6* Forward: TCTGGACAAGGACGAAGGTAGAGC  
Reverse: CAGACCGCAACTGGAGCAGATATTC

---
